# Supplementary material
Source: HighWire-hosted journal article supplement (https://erj.ersjournals.com/content/54/3/1801797)
Supplement: inline-supplementary-material-2 [file inline-supplementary-material-2.pdf]

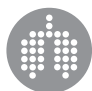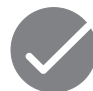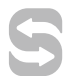

SHAREABLE PDF

# Cardiovascular safety of nintedanib in subgroups by cardiovascular risk at baseline in the TOMORROW and INPULSIS trials

Imre Noth<sup>1</sup>, Marlies Wijsenbeek<sup>2</sup>, Martin Kolb <sup>3</sup>, Francesco Bonella<sup>4</sup>, Lizette Moros<sup>5</sup>, Daniel Wachtlin<sup>6</sup> and Tamera J. Corte<sup>7,8</sup>

**Affiliations:** <sup>1</sup>Division of Pulmonary and Critical Care Medicine, University of Virginia School of Medicine, Charlottesville, VA, USA. <sup>2</sup>Dept of Pulmonary Medicine, Erasmus MC, University Medical Center, Rotterdam, The Netherlands. <sup>3</sup>Dept of Respiratory Medicine, Pathology and Molecular Medicine, McMaster University, Hamilton, ON, Canada. <sup>4</sup>Interstitial and Rare Lung Disease Unit, Ruhrlandklinik, University Hospital, University of Duisburg-Essen, Essen, Germany. <sup>5</sup>Boehringer Ingelheim International GmbH, Ingelheim am Rhein, Germany. <sup>6</sup>Boehringer Ingelheim Pharma GmbH & Co. KG, Ingelheim am Rhein, Germany. <sup>7</sup>Royal Prince Alfred Hospital, Camperdown, Australia. <sup>8</sup>University of Sydney, Sydney, Australia.

**Correspondence:** Imre Noth, Division of Pulmonary and Critical Care Medicine, University of Virginia School of Medicine, 1215 Lee Street, Charlottesville, VA 22908, USA. E-mail: IN2C@hscmail.mcc.virginia.edu

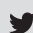

@ERSpublications

In pooled data from the randomised TOMORROW and INPULSIS trials in patients with IPF, the incidence rates of major adverse cardiovascular events were similar in the nintedanib and placebo groups both in patients with higher and lower cardiovascular risk <http://bit.ly/2KUY8IP>

**Cite this article as:** Noth I, Wijsenbeek M, Kolb M, *et al.* Cardiovascular safety of nintedanib in subgroups by cardiovascular risk at baseline in the TOMORROW and INPULSIS trials. *Eur Respir J* 2019; 54: 1801797 [<https://doi.org/10.1183/13993003.01797-2018>].

This single-page version can be shared freely online.

**ABSTRACT** Nintedanib is a tyrosine kinase inhibitor used to treat idiopathic pulmonary fibrosis (IPF). We investigated the cardiovascular safety of nintedanib using pooled data from the TOMORROW and INPULSIS trials.

Cardiovascular events were assessed *post hoc* in patients with a history of atherosclerotic cardiovascular disease (CVD) and/or one or more cardiovascular risk factors at baseline (“higher cardiovascular risk”) and patients with no history of atherosclerotic CVD and no cardiovascular risk factors at baseline (“lower cardiovascular risk”).

Incidence rates were calculated for 1231 patients (n=723 nintedanib and n=508 placebo), of whom 89.9% had higher cardiovascular risk. Incidence rates of major adverse cardiovascular events were similar in the nintedanib and placebo groups in patients with higher cardiovascular risk (3.88 (95% CI 2.58–5.84) and 3.49 (95% CI 2.10–5.79) per 100 patient-years, respectively) and lower cardiovascular risk (4.78 (95% CI 1.54–14.82) and 5.37 (95% CI 1.73–16.65) per 100 patient-years, respectively). Incidence rates of myocardial infarction in the nintedanib and placebo groups, respectively, were 3.03 (95% CI 1.91–4.81) and 1.16 (95% CI 0.48–2.79) per 100 patient-years in patients with higher cardiovascular risk and 1.59 (95% CI 0.22–11.29) and 1.78 (95% CI 0.25–12.64) per 100 patient-years in patients with lower cardiovascular risk. Incidence rates of other ischaemic heart disease in the nintedanib and placebo groups, respectively, were 1.85 (95% CI 1.02–3.34) and 3.28 (95% CI 1.94–5.54) per 100 patient-years in patients with higher cardiovascular risk and 0 and 1.80 (95% CI 0.25–12.78) per 100 patient-years in patients with lower cardiovascular risk.

These data help to establish the cardiovascular safety profile of nintedanib in IPF.
